# Supplementary material for: A highly efficient colourless sulfur/iodide-based hybrid electrolyte for dye-sensitized solar cells
Source: Royal Society of Chemistry journal article supplement (doi:10.1039/c2ra20310c), 2012-01-01
Supplement: c2ra20310c.pdf [file c2ra20310c.pdf]

Supplementary Information

## A Highly Efficient Colourless Sulphur/Iodide-based Hybrid Electrolyte for Dye-sensitized Solar Cells

Jiayan Cong,<sup>a</sup> Xichuan Yang,<sup>\*a</sup> Yan Hao,<sup>a</sup> Lars Kloo<sup>b</sup> and Licheng Sun<sup>\*a,b</sup>

<sup>a</sup> State Key Laboratory of Fine Chemicals, DUT-KTH Joint Education and Research Center on Molecular Devices, Dalian University of Technology (DUT), # Linggong Rd. 116024 Dalian, China;

<sup>b</sup> School of Chemical Science and Engineering, Center of Molecular Devices, Department of Chemistry, Royal Institute of Technology (KTH), Teknikringen 30, 10044 Stockholm, Sweden

### Synthesis of tetramethylammonium sulfide (TMAS):

A 25 wt.% solution of tetramethylammonium hydroxide in water (16.00 g, 44 mmol; Sinopharm Chemical Reagent Co., Ltd.) was added to a ammonium sulfide water solution with a concentration of 17 % (9.35 g, 22 mmol; Yizhong Chemical plant in Tianjin Dagang). The mixture was stirred and the water was evaporated and the resulting white solid was dried under vacuum at 40 °C.

### Synthesis of the polysulfide (S<sup>2-</sup>/S<sub>x</sub><sup>2-</sup>) redox couple with tetramethylammonium cation:

Sulphur (40 mg, 1.25 mmol) and tetramethylammonium sulphide (TMAS, 225 mg, 1.25 mmol) were dissolved in 25 mL acetonitrile, and then heated at 70 °C for 3 hours. The solution turned to green. Then put the solution in room temperature overnight, the solution turned transparent and colorless. The solvent was diluted, and used in the electrolyte. To investigate the resultant, we repeat the experiment in ethanol, and we can get transparent crystal by recrystallisation. The elementary analysis was carried with the result (Found/% N: 9.019; C:

31.365; S: 52.015; H: 7.601; Calcd/% N: 9.077; C: 31.135; S: 51.950; H: 7.838), which led to the compound  $[\text{N}(\text{CH}_3)_4]^+ ]_2 \text{S}_5^{2-}$ .

#### **Electrochemical characterization of the redox couple:**

Electrochemical redox potentials were obtained by cyclic voltammetry (CV) using a three electrode cell and an electrochemical workstation (BAS100B, USA). The working electrode was a glass carbon electrode (HCH Instruments, Inc., Part Number: MF-2012), the auxiliary electrode was a Pt wire (HCH Instruments, Inc., Part Number: CHI115), and Non-Aqueous  $\text{Ag}/\text{Ag}^+$  reference (HCH Instruments, Inc., Part Number: CHI112) was used as reference electrode. Tetrabutylammonium hexafluorophosphate ( $\text{TBAPF}_6$ ) 0.01 M was used as supporting electrolyte in  $\text{CH}_3\text{CN}$ . Usually, the ferrocenium/ferrocene ( $\text{Fc}^+/\text{Fc}$ ) redox couple is used as an internal potential reference. However, in our systems the redox couple can react with ferrocene, and instead we use the oxidizing potential of oxygen as the internal potential reference (green line in Fig. S3). CV experiments were carried out at 22 °C over the potential range 1.5 V to -1.5 V vs.  $\text{Ag}/\text{Ag}^+$  at a scan rate of 100  $\text{mV s}^{-1}$ .

#### **Device fabrication:**

$\text{TiO}_2$  film fabrication: Fluorine-doped tin oxide (FTO) glass plates (Pilkington-TEC8) were cleaned (in the order: detergent water solution, and ethanol) using an ultrasonic bath. A layer of compact  $\text{TiO}_2$  was deposited on the conducting glass substrate by an electrochemical method. The deposition bath was an alkaline (pH = 10) aqueous solution (250 ml) containing 40 mmol titanium tetrachloride  $\text{TiCl}_4$  (Aladdin Chemistry Co., Ltd., 99.9 %), 40 mmol ethylenediaminetetraacetic acid EDTA (China Harbin Chemical Reagent Plant, 99.5 %) and 25 mmol sodium chloride  $\text{NaCl}$

(Tianjin Damao Chemical Reagent Factory, 99.5 %). The depositions were performed at room temperature (22 °C) in a 250 ml beaker using a three-electrode configuration. The substrate was a 25×75 mm FTO substrate film previously cleaned by ultrasonic washing. A platinum wire electrode (HCH Instruments, Inc., Part Number: CHI115) served as the counter electrode and an Ag/AgCl electrode (HCH Instruments, Inc., Part Number: CHI111) was used as the reference. The deposition potential was -0.8 V vs. Ag/AgCl, and deposition time was set to 30 min. An electrochemical workstation (Shanghai Huachen Instruments, model CH1630D) interfaced with a PC was employed for the depositions. A layer of 13 nm (DHS-TPP3, Heptachroma, China) paste (ca. 2.4 μm) was coated on the deposited FTO glass by screen printing and then dried for 6 min at 125 °C. This procedure was repeated for 5 times (ca. 12 μm) and 8 times (ca. 19 μm) respectively. Thereafter, a layer of 300 nm (DHS-SLP1, Heptachroma, China) titania paste (ca. 4 μm) was coated as scattering layer. The double-layer TiO<sub>2</sub> electrodes (area: 6×6 mm) were gradually heated under an air flow at 520 °C for 30 min. The sintered film was further treated with 40 mM TiCl<sub>4</sub> aqueous solution at 70 °C for 30 min, then washed with water and ethanol, and annealed at 500 °C for 60 min. After the film was cooled to 80 °C, it was immersed into a  $2 \times 10^{-4}$  M dye solution of cis-bis(isothiocyanato)bis(2,2"-bipyridyl-4,4"-dicarboxylato)-ruthenium(II) bis-tetrabutylammonium (N719) solution in ethanol and maintained under dark conditions for 24 h. The sensitized TiO<sub>2</sub> electrode was then rinsed with ethanol and dried. The hermetically sealed cells were fabricated by assembling the dye-loaded film as the working electrode and a sputtered Pt/FTO counter electrode separated with a hot-melt Surlyn 1702 film (25 μm, Dupont).

**The explanation of peaks in the cyclic voltammograms:**

In order to investigate the electron transport process in the electrolytes, several compositions of the electrolytes were investigated by cyclic voltammetry (CV). As shown in Fig. S1, a solution of 0.01 M I<sub>2</sub> was studied as reference. Only one oxidation peak was found in the range from 0 to 1000 mV, and it is supposed to correspond to the oxidation of I<sub>2</sub>/I<sub>3</sub><sup>-</sup>. When an excess of LiI (0.03 M) is added to the solution, the single oxidation peak splits into two peaks (Fig. S2). The left one corresponds to the oxidation of I<sub>2</sub>/I<sub>3</sub><sup>-</sup> and the right one to the oxidation of I<sup>-</sup>/I<sub>3</sub><sup>-</sup>. This is similar to the shape of the CV curve for the hybrid electrolyte C (red curve in Fig. S3) mentioned in the main article. (Electrolyte A contains the redox system S<sup>2-</sup>/S<sub>x</sub><sup>2-</sup> only the electrolyte B corresponds to the hybrid electrolyte and electrolyte C corresponds to electrolyte A with an excess of I<sub>2</sub>.)

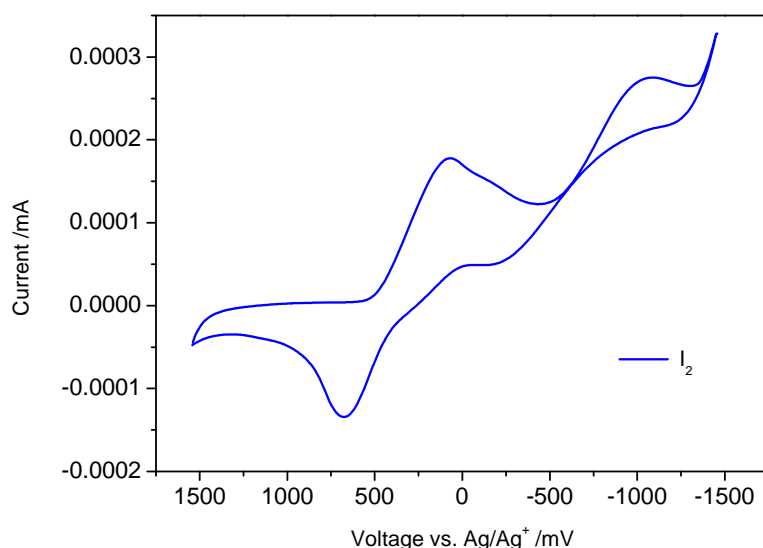

**Fig. S1 CV-curve of the iodine in acetonitrile solution.** The working electrode was a glassy carbon electrode, the auxiliary electrode was a Pt wire, and a non-aqueous Ag/Ag<sup>+</sup> electrode was used as reference electrode. Tetrabutylammonium hexafluorophosphate (TBAPF<sub>6</sub>) of 0.01 M concentration was used as supporting electrolyte in acetonitrile.

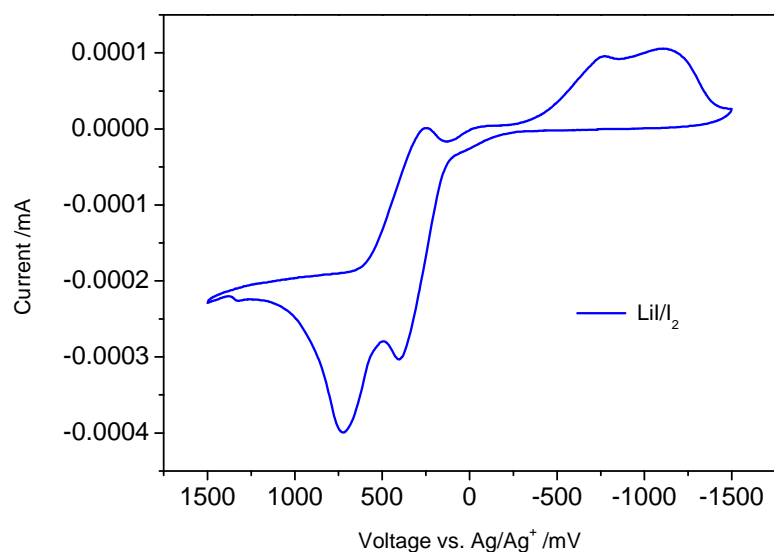

**Fig. S2 CV-curve of the  $\text{LiI}/\text{I}_2$  in acetonitrile solution.** The working electrode was a glassy carbon electrode, the auxiliary electrode was a Pt wire, and a non-aqueous  $\text{Ag}/\text{Ag}^+$  electrode was used as reference electrode. Tetrabutylammonium hexafluorophosphate ( $\text{TBAPF}_6$ ) of 0.01 M concentration was used as supporting electrolyte in acetonitrile.

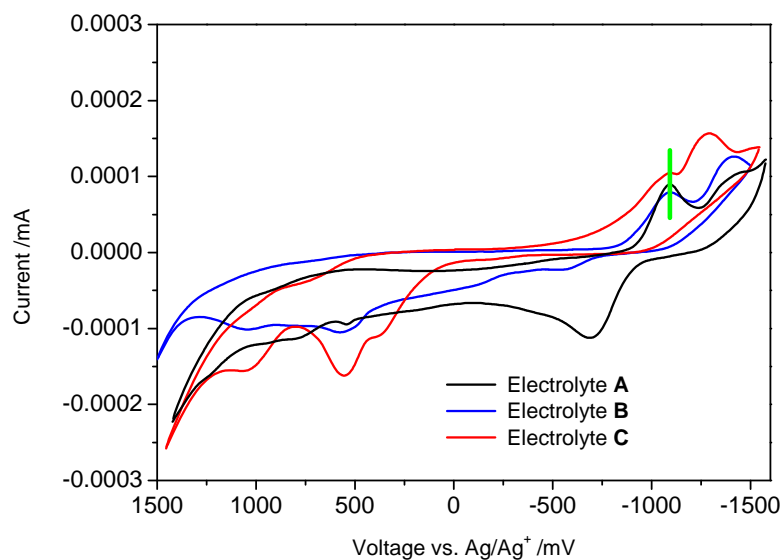

**Fig. S3 CV-curve of the electrolytes A-C in acetonitrile solution.** The working electrode was a glassy carbon electrode, the auxiliary electrode was a Pt wire, and a non-aqueous  $\text{Ag}/\text{Ag}^+$  electrode was used as reference electrode. Tetrabutylammonium hexafluorophosphate ( $\text{TBAPF}_6$ ) of 0.01 M concentration was used as supporting electrolyte in acetonitrile.

### The equivalent circuit model of EIS:

The EIS spectra were measured under AM 1.5 illumination at  $V_{oc}$  at room temperature. The equivalent circuit model is shown in Fig S4. A series resistance ( $R_s$ ) was introduced to describe the ohmic resistance of the load and the conducting substrate. Recombination resistance at the  $TiO_2$ /electrolyte interface and the chemical capacitance of the  $TiO_2$  were described by  $R_r$  and  $C_{\mu}$ . The counter-electrode charge transfer resistance ( $R_{CE}$ ) the associated  $C_{CE}$  were measured by fitting the arc observed at higher frequencies in Fig. 6. The impedance of diffusion in the electrolyte is described by Warburg impedance ( $Z_w$ ).

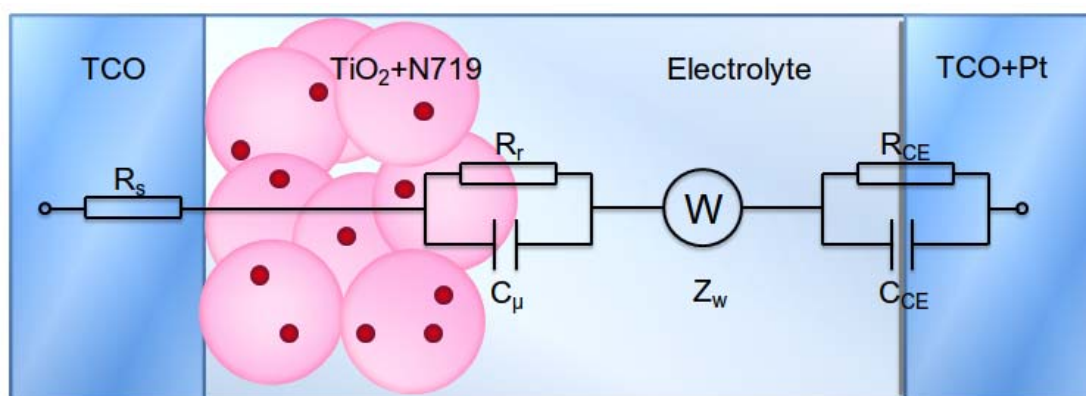

**Fig. S4** Equivalent circuit model to fit the experiment data.

### Measurement of conduction band edge of $TiO_2$ in different electrolytes:

Mott-Schottky plot were used to estimate the conduction band edge of  $TiO_2$ . Mott-Schottky plots were measured in three electrodes system by Electrochemical workstation (Zahner). The result are shown in Fig. S5. The working electrode was double layer  $TiO_2$  film that used in fabrication of DSCs, the counter electrode was a Pt wire, and 0.1 M  $Ag/AgNO_3$  reference was used as reference electrode. The hybrid electrolyte **SI4** and conventional iodine/triiodine electrolyte **I1** was measured. Calculated from the Mott-Schottky plots, the conduction band of

TiO<sub>2</sub> using hybrid electrolyte is about 20 mV negative than the conventional iodide/triiodide electrolyte.

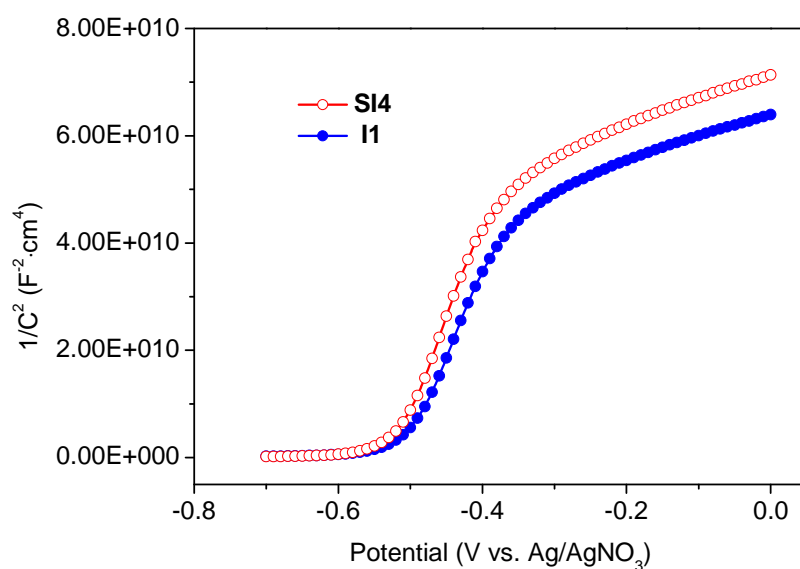

**Fig. S5 Mott-Schottky plots of TiO<sub>2</sub> in hybrid electrolyte SI4 (open symbols) and conventional iodine/iodide electrolyte I1 (filled symbols).**

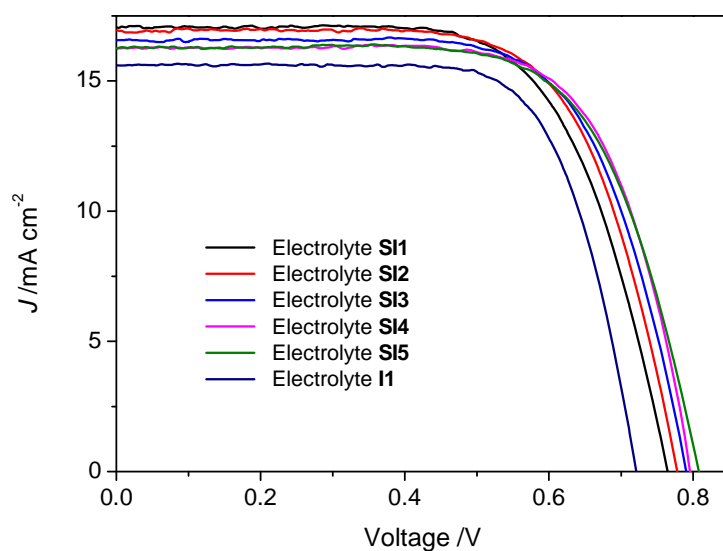

**Fig. S6 Photocurrent density-voltage curves ( $J$ - $V$ ) of DSCs containing a hybrid or an iodine-based redox electrolyte.** Data are shown for DSCs containing the hybrid electrolyte SI series and the pure  $I^-/I_3^-$  based electrolyte I2. Electrolytes SI1 to SI5: contain different amount of TMAS and the other solutes: 0.60 M DMPII, 0.28 M TBP, 0.068 M LiI, 0.05 M GuSCN; electrolyte I1: 0.60 M DMPII, 0.03 M I<sub>2</sub>, 0.053 M LiI, 0.28 M TBP and 0.05 M GuSCN; electrolyte: I2 0.60 M DMPII, 0.03 M I<sub>2</sub>, 0.068 M LiI, 0.28 M TBP and 0.05 M

GuSCN, all the electrolytes were based on acetonitrile as solvent. The cells were investigated under air mass 1.5 global (AM 1.5 G) ( $100 \text{ mW}\cdot\text{cm}^{-2}$ ) light irradiation.

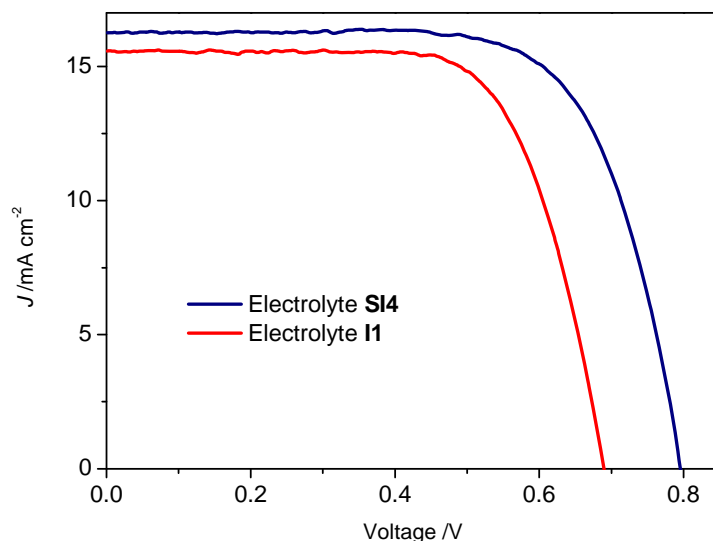

**Fig. S7 Photocurrent density-voltage curves ( $J$ - $V$ ) of devices for electrochemical impedance investigation.** Devices contained  $19 + 4 \mu\text{m}$  double-layer  $\text{TiO}_2$  film. Hybrid electrolyte **SI4** (0.20 M TMAS, 0.20 M S, 0.60 M DMPII, 0.28 M TBP, 0.068 M LiI, 0.05 M GuSCN), and the  $\Gamma/I_3^-$ -based electrolyte **I1** (0.60 M DMPII, 0.03 M  $I_2$ , 0.053 M LiI, 0.28 M TBP and 0.05 M GuSCN) were used. Cells were investigated using a metal mask with an aperture area of  $0.159 \text{ cm}^2$  and under air mass 1.5 global (AM 1.5 G) ( $100 \text{ mW}\cdot\text{cm}^{-2}$ ).

**Table S1 Photovoltaic characteristics of devices used for electrochemical impedance investigation.**

|            | $V_{oc}$ (mV) | $J_{sc}$ ( $\text{mA}\cdot\text{cm}^{-2}$ ) | $FF$ | $\eta$ (%) |
|------------|---------------|---------------------------------------------|------|------------|
| <b>SI4</b> | 796           | 16.3                                        | 0.70 | 9.1        |
| <b>I1</b>  | 690           | 15.6                                        | 0.70 | 7.5        |

Detailed photovoltaic parameters of devices for electrochemical impedance investigation under AM 1.5 G irradiation.



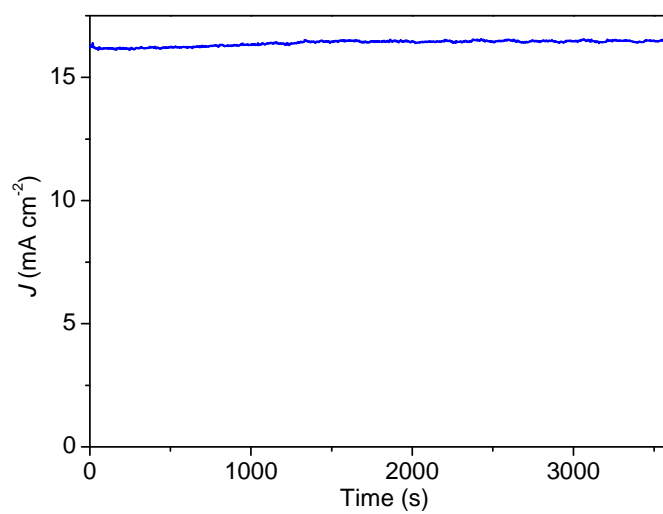

**Fig. S8** The current density-time curve of DSC based on the electrolyte SI4 during 1 hour of light irradiation.
